RESEARCH ARTICLE

# The association between dengue immunoglobulin G titres with previous clinical dengue infection and white cell counts in Cuban children: A population-based study

Ramón Suárez-Medina<sup>1\*</sup>, Silvia Josefina Venero-Fernández<sup>1</sup>, Lourdes Batista-Gutierrez<sup>1</sup>, Yanelis de los Angeles Estrada-Rondon<sup>2</sup>, Anadelis Alfonso-Hernandez<sup>2</sup>, Dulcima Casanave-Guarnaluze<sup>2</sup>, Nieves Sardinias-Baez<sup>2</sup>, Ivette Castillo-Aguilar<sup>2</sup>, Jorge Antonio Febles-del Toro<sup>2</sup>, Andrew W. Fogarty<sup>3</sup>, the HINASIC (Historia Natural de la Sibilancia en Cuba/Natural History of Wheezing in Cuba) Study Group<sup>†</sup>

**1** Instituto Nacional de Higiene, Epidemiología y Microbiología, Infanta No 1158 e/ Llinás y Clavel, Código Postal, La Habana, Cuba, **2** Dirección Municipal de Salud Pública municipios Cerro y Arroyo Naranjo, La Habana, Cuba, **3** Nottingham NIHR Biomedical Research Unit, Division of Epidemiology and Public Health, University of Nottingham, Clinical Sciences Building, City Hospital, Nottingham, United Kingdom

<sup>†</sup> Membership of the author group can be found in the Acknowledgments

\* [ramonsm@inhem.sld.cu](mailto:ramonsm@inhem.sld.cu)

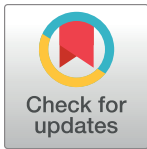

**OPEN ACCESS**

**Citation:** Suárez-Medina R, Venero-Fernández SJ, Batista-Gutierrez L, Estrada-Rondon YdIA, Alfonso-Hernandez A, Casanave-Guarnaluze D, et al. (2018) The association between dengue immunoglobulin G titres with previous clinical dengue infection and white cell counts in Cuban children: A population-based study. PLoS ONE 13(11): e0207391. <https://doi.org/10.1371/journal.pone.0207391>

**Editor:** Shamala Devi Sekaran, University of Malaya, MALAYSIA

**Received:** July 19, 2018

**Accepted:** October 30, 2018

**Published:** November 28, 2018

**Copyright:** © 2018 Suárez-Medina et al. This is an open access article distributed under the terms of the [Creative Commons Attribution License](https://creativecommons.org/licenses/by/4.0/), which permits unrestricted use, distribution, and reproduction in any medium, provided the original author and source are credited.

**Data Availability Statement:** An anonymised dataset from which the main results can be replicated is available as a Supporting Information file. Further data are available from Dr. Ramon Suarez-Medina for researchers who meet the criteria for access to confidential data.

**Funding:** This work was supported by The Wellcome Trust [grant number 090375]; Nottingham NIHR Biomedical Respiratory

## Abstract

### Background

The prevalence of dengue infection is increasing globally. There are few prospective population-based surveillance studies of the immunological and inflammatory consequences of exposure to dengue virus in young children.

### Objective

To study the association between serologically confirmed prior medical diagnosis of dengue infection and blood measures of systemic inflammation with dengue virus immunoglobulin G levels.

### Methods

A population-based study of healthy three-year old children living in Havana, Cuba.

### Results

865 individuals provided a blood sample. Fourteen (1.6%) had a prior medical diagnosis of dengue infection, and 851 individuals had no prior medical diagnosis. There was no difference in the serum immunoglobulin G titres between these groups (Mann-Whitney test,  $p = 0.49$ ). Total white cell count, blood neutrophil and eosinophil counts were linearly associated with a dengue immunoglobulin G value above the median value.

Research Unit; Nottingham University Hospital Charity and the British Medical Association James Trust Award. The funders had no role in study design, data collection and analysis, decision to publish, or preparation of the manuscript.

**Competing interests:** The authors have declared that no competing interests exist.

## Conclusions

There was no difference between the dengue immunoglobulin G titres in young children who had previously had clinically proven dengue infection compared to those who had no diagnosis of prior infection. This may be a consequence of a relatively high prevalence of sub-clinical infection. A higher dengue immunoglobulin G level was positively associated with a range of inflammatory biomarkers, although these data cannot demonstrate a causal association.

## Introduction

Although dengue infection results in substantial morbidity and mortality [1], there have been no population-based studies in young children aged three years, and as a consequence there are no clear definitions of dengue immunoglobulin G (IgG) serological thresholds to define prior exposure. However, knowledge of cases of definite prior clinical infection with dengue virus may help identify these threshold values, and also permit comparison with a control group with no prior infection, hence allowing estimation of the number of sub-clinical cases of dengue infection.

We have used data from a community-based study of healthy three-year old children living in Havana, Cuba, to explore the association of increased titres of dengue IgG immunoglobulin for those with a definite prior clinical diagnosis of dengue infection, compared to those with no history of dengue infection. We also assessed the association of increased titres of dengue IgG immunoglobulin with blood measurements of inflammation as previous studies have demonstrated that leucocytes are decreased during acute dengue virus infection [2–9].

## Methods

### Study population

The study population was originally selected to investigate the risk factors for asthma and allergic disease for children living in Havana, Cuba and has been described in detail previously [10]. Briefly, 1956 children aged 12 to 15 months were randomly selected from four municipalities across Havana in 2010 and 2011 and data collected on their family history and living environments. Parents or guardians of all children who participated gave written consent, and the study was approved by both the Instituto Nacional de Higiene, Epidemiología y Microbiología Ethics Committee (Havana, Cuba) and the University of Nottingham Ethics Committee (Nottingham, UK).

### Data collection

Baseline data were collected in the first year of the study. The study participants were subsequently followed up each year and the third year of data collection spanned June 2012 to July 2013. At the time of the follow-up interview in the third year of data collection the parent/guardian was asked if and when the child had been diagnosed with dengue infection by the Cuban health authorities. All children with suspected dengue infection in Cuba are referred to the hospital for investigation including serological (IgM) testing and these results are then given to the parents/guardian. A blood sample was collected from children who had no current symptoms of viral infection and this was stored in a freezer at -20 degrees Centigrade. This

was subsequently defrosted and analysed for dengue immunoglobulin G (IgG) serology using the Vircell assay to generate an antibody index [11], serum immunoglobulin E (IgE) [12], highly sensitive C- Reactive Protein (hsCRP) [13]. A full blood count allowed the haemoglobin level and circulating white cell count to be measured.

### Statistical analysis

The cases with a definite prior medical diagnosis of dengue infection were compared with those with no prior medical diagnosis of dengue infection. The exposure of dengue IgG levels were initially plotted as a histogram to explore the distribution. This demonstrated that a substantial proportion of the population has no serum dengue IgG response (Fig 1). A binary outcome measure of an elevated serum IgG titre was then generated by calculating the median value. An elevated dengue IgG was defined as above the median value, and compared with those values that were equal to or below the median.

Logistic regression was used to explore the association of the blood exposures of interest with an increased dengue IgG titre with the various outcome measures using Stata v14 statistical software (Texas, USA).

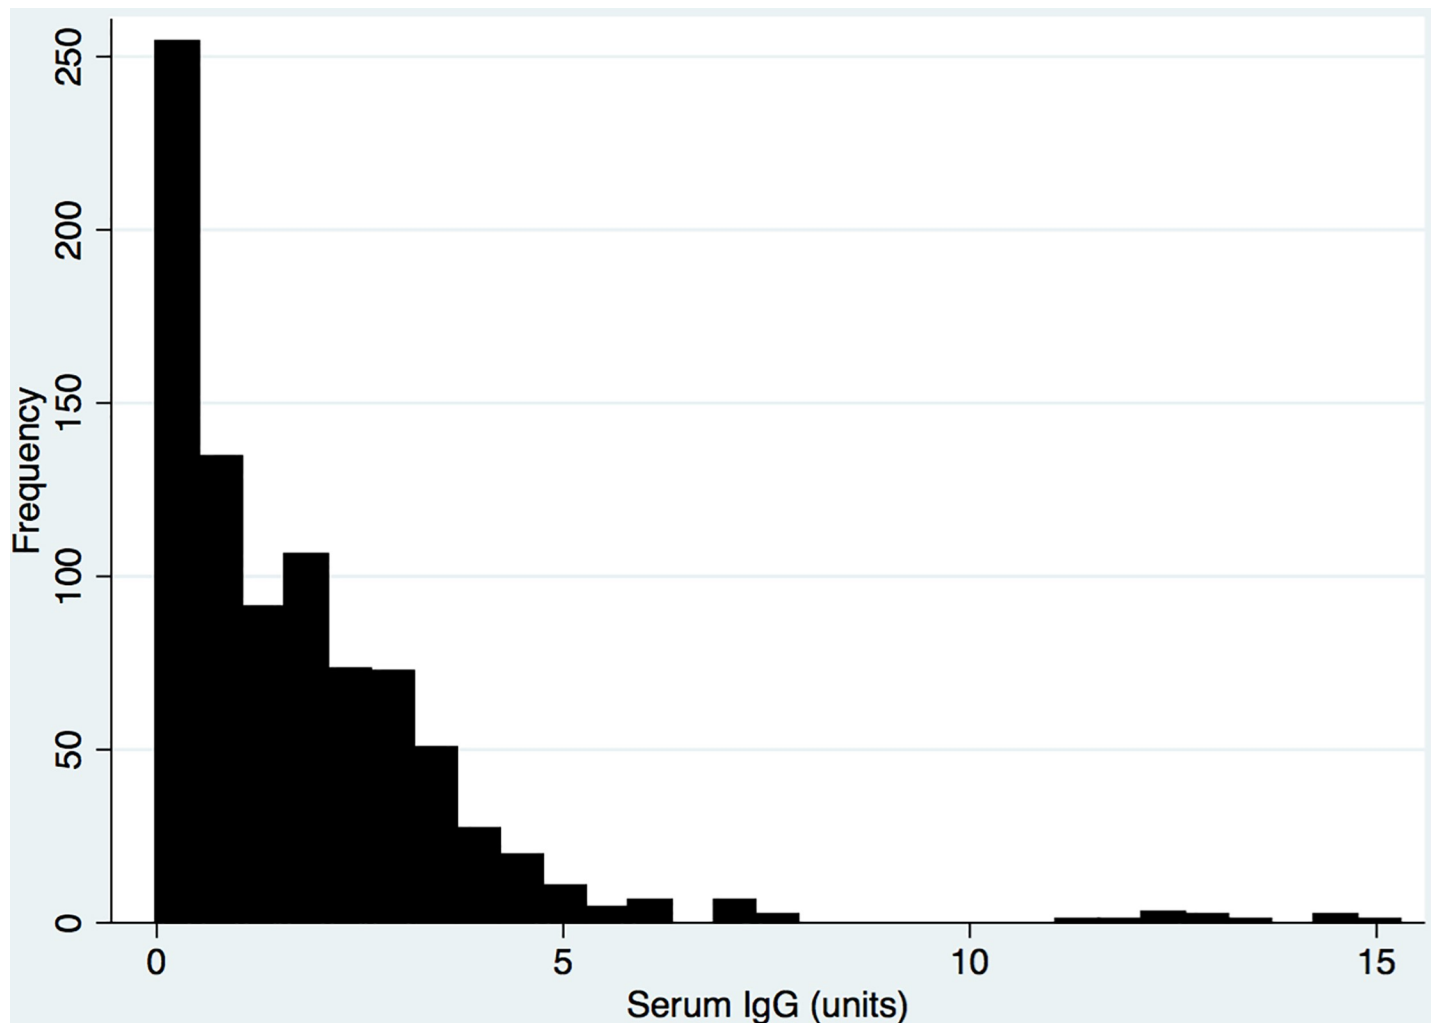

Fig 1. Histogram of dengue IgG levels.

<https://doi.org/10.1371/journal.pone.0207391.g001>

## Results

1543 individuals provided data for the third year of the study, and of these 865 (56%) donated a blood sample that was analysed to generate the dengue IgG measurements (Table 1). 439 individuals (51%) were male and the median age was 39.6 months (interquartile range 37.2 to 42.0). The range of dengue IgG titres for the study population is presented in the Fig 1, and had a median value of 1.3 (interquartile range of 0.37 to 2.6).

There were 14 (1.6%) individuals with a prior medical diagnosis of dengue infection, and these cases had a median dengue IgG titre of 1.26 (interquartile range IQR 0.60 to 3.10). There were 851 individuals with no prior medical diagnosis of dengue infection, and this group had a median IgG titre of 1.30 (0.34 to 2.57). There was no statistical difference between the IgG levels for these two groups (Fig 2, Mann-Whitney test,  $p = 0.49$ , S1 Data). Four hundred and thirty one individuals (50.6%) with no previous medical diagnosis of dengue infection had IgG titres above the median value for those who had a prior medical diagnosis of dengue infection, while only 131 individuals (15.4%) of this group had no dengue IgG response at all.

The total white cell count was linearly negatively associated with a dengue IgG value above the median value with an odds ratio (OR) of 0.87 (95% confidence intervals CI: 0.78 to 0.96) per unit increase in white cell count. Blood neutrophil and eosinophil counts were also linearly negatively associated with dengue IgG, with ORs of 0.90 (95% CI: 0.85 to 0.95) and 0.70 (95% CI: 0.61 to 0.78) respectively. There was no association of blood lymphocyte counts, log serum IgE, or log serum hsCRP with increased blood dengue IgG levels

## Discussions

This is the first population-based study in three-year old children to explore the differential serological response between cases with medically confirmed prior infection and those with no previous infection. There was no significant difference between the two groups, and there was a substantial proportion of the non-infected control group with IgG titres above those of the infected group, suggesting possible sub-clinical infection. We also identified that an elevated

**Table 1. Study population with associations with increased dengue IgG titres.**

|                                                        | Summary statistics      | Association with increased dengue levels* (95% CI) |
|--------------------------------------------------------|-------------------------|----------------------------------------------------|
| Females                                                | 426 (49%)               | 1.00                                               |
| Males                                                  | 439 (51%)               | 0.93 (0.74 to 1.17)                                |
| Median age, months                                     | 39.6 (IQR 37.2 to 42.0) | 1.03 (1.02 to 1.04)                                |
| Mean total white cell count, $\times 10^3/\mu\text{L}$ | 8.7 (sd 1.7)<br>N = 793 | 0.87 (0.78 to 0.96)                                |
| Mean neutrophil count, $\times 10^3/\mu\text{L}$       | 3.8 (1.5)<br>N = 792    | 0.90 (0.85 to 0.95)                                |
| Mean eosinophil count, $\times 10^3/\mu\text{L}$       | 0.4 (0.4)<br>N = 783    | 0.70 (0.61 to 0.78)                                |
| Mean lymphocyte count, $\times 10^3/\mu\text{L}$       | 4.4 (1.4)<br>N = 792    | 0.94 (0.82 to 1.07)                                |
| Log serum IgE, IU/ml                                   | 3.8 (1.3)<br>N = 850    | 0.95 (0.86 to 1.04)                                |
| Log serum hsCRP, mg/L                                  | -1.9 (2.7)<br>N = 850   | 0.98 (0.93 to 1.04)                                |

Statistical analysis using logistic regression with robust standard errors to adjust for clustering by municipality.

sd = Standard deviation. CI = confidence intervals. ISR = interquartile range

\* odds ratio of risk of having serum dengue titre above the median value

<https://doi.org/10.1371/journal.pone.0207391.t001>

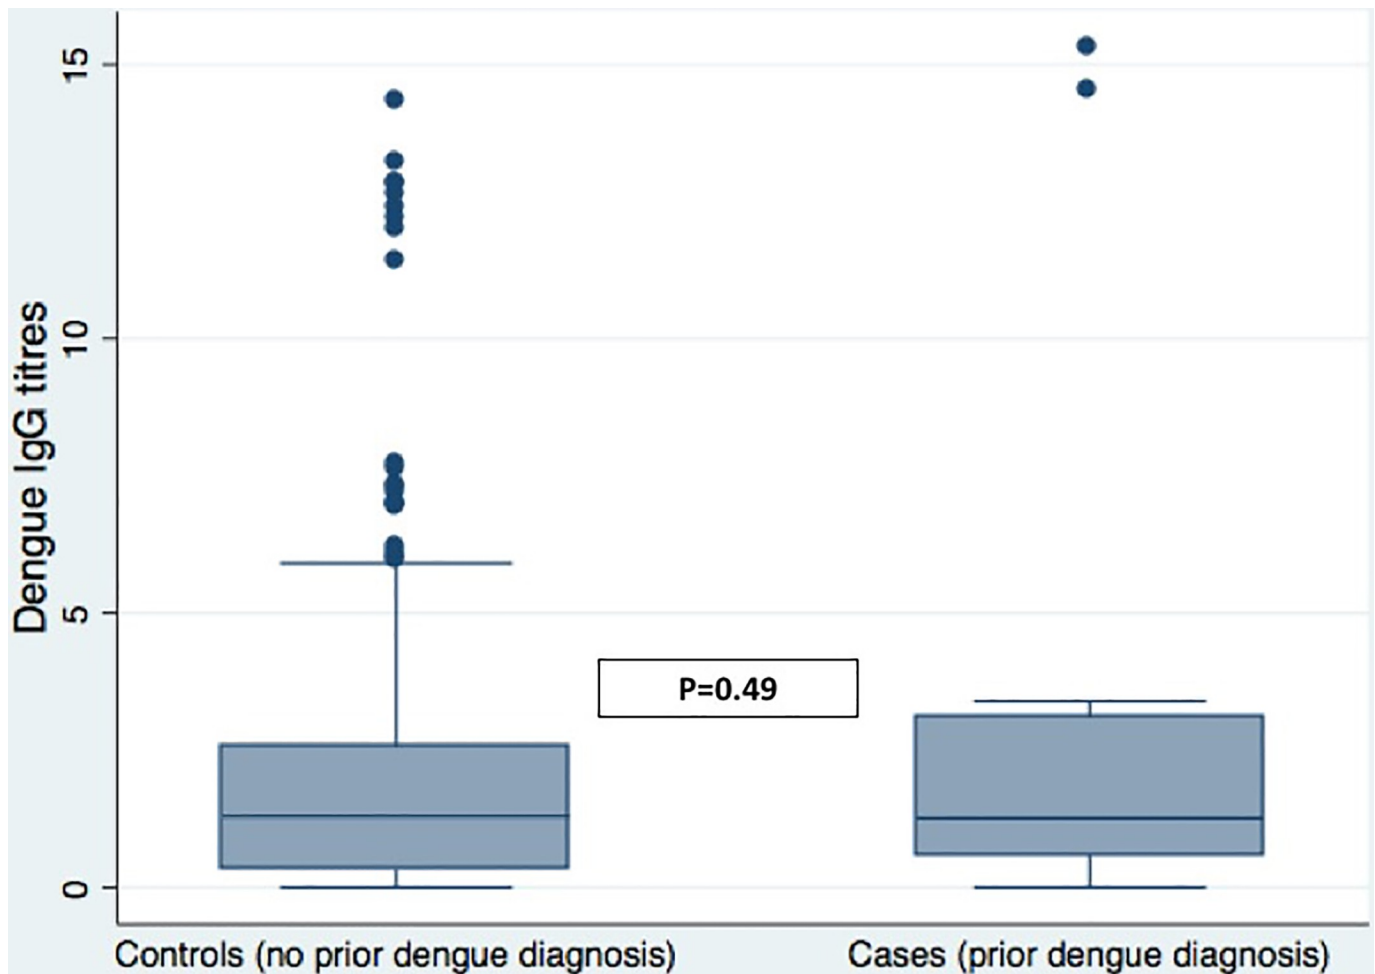

**Fig 2. Comparison of the distribution of IgG dengue serology stratified by cases with medically confirmed dengue infection and controls with no medical diagnosis of dengue infection.** The box plot shows the median value (central line in box) and the 25<sup>th</sup> and 75<sup>th</sup> percentiles (horizontal lines of box). The individual horizontal lines demonstrate the limits of adjacent data, and the dots represent the outlying values. Statistical comparison used the Mann-Whitney test.

<https://doi.org/10.1371/journal.pone.0207391.g002>

dengue IgG level was associated with decreased blood leucocyte levels, lower neutrophil and eosinophil levels, although our cross-sectional study design does not allow any causal inferences to be drawn.

The strengths of this analysis include the population-based nature of the cohort, and the use of objective measures of both the exposures and the outcome measures to minimise the risk of observer bias. The study was based in policlinics that are the first point of contact for Cubans with the national health system. The study was designed to study allergic disease and hence there was no sensitisation or risk of increased awareness of the risk of dengue infection above that expected in the general Cuban population, who were experiencing an increase in the incidence of dengue infection cases at the time [14]. All children with suspected dengue infection in Cuba are referred to the hospital for investigation including serological (IgM) testing, and hence we are confident that a positive medical diagnosis of dengue is correct. In addition, the absence of alternative health providers in Cuba makes it unlikely that a diagnosis of acute dengue infection would be made elsewhere. As the dengue IgG assay that we used has not been validated as a measure of previous infection in three-year old children, a binary outcome variable was generated based on whether an individual's dengue IgG response was above

or below the median value for the whole population. This is a pragmatic but relatively simple statistical test that demonstrates that it is unlikely that these associations occurred by chance, but do not explain the natural history of any biological processes that may be involved. It is well recognised that the antibody response to external exposures in young children below the age of five years old is limited, increasing as the child gets older [15], and hence this binary outcome measure of dengue IgG may not necessarily equate to prior clinical infection [11]. It is important to clarify that our data may not be generalizable to other different populations, especially those that are older and hence are likely to have more mature immune systems, or that are living different in other geographical locations where the prevalence of dengue and other associated environmental factors will differ to those in Cuba.

The comparison of the serological IgG titres between the diagnosed cases of prior dengue infection and the control group with no prior infection is interesting. There is no difference between the serum IgG levels between the two groups, and although the number of cases is relatively low, we would anticipate that these numbers would be sufficient to observe a difference in serum dengue IgG titres if the control group has had no prior exposure at all to dengue virus. This raises the possibility that the control group have had substantial sub-clinical dengue virus exposure. Quantifying this population is challenging in the absence of a threshold for the IgG serological assay, but 51% of the control population had a serum IgG level above the median value of those who have had medically confirmed dengue infection and 15% had no detectable serum IgG to dengue. An alternative explanation for the absence of a difference between IgG titres between the two groups is that in the context of a maturing immune system, some of the children who had definite prior IgG infection were not able to generate a robust immune response. However, as age was positively associated with risk of increased dengue IgG and is also a measure of the duration of risk of exposure to dengue infection, the former explanation is more plausible.

The observation that dengue virus exposure is often a sub-clinical event has been made previously in a large epidemiological study of children and adults living in Santiago de Cuba, in 1997. This analysis estimated that approximately 3% of primary dengue infections were clinically overt, with the remaining 97% being subclinical [16]. Some of these subclinical cases may constitute children who experienced a low-grade febrile episode that was independently managed by the carers, and did not come to the attention of the medical authorities. Infection with a variety of viruses including arboviruses are present in the tropics, and are understandably not always brought to the attention of the medical authorities. Our data are consistent with this hypothesis, and suggest that there is no significant difference in the residual IgG immune response between those who had clinically overt dengue infection and those who did not. The immune response may be of potential clinical importance, as a secondary dengue infection after a primary infection generates a more symptomatic dengue infection [17, 18]. This is an area with limited epidemiological data, and hence continued observation of similar cohorts with good baseline data will help increase understanding of the natural history of clinical response dengue infection over the life course.

In conclusion, data from a population-based study of healthy young children living in Havana, Cuba has demonstrated that cases with prior serologically confirmed dengue infection have similar dengue serological IgG levels to those with no prior medical diagnosis of dengue infection. This may represent a substantial prevalence of sub-clinical dengue infection.

## Supporting information

**S1 Data. The dengue serology data can be found at [plosonedenguedata](https://doi.org/10.1371/journal.pone.0207391). (XLS)**

## Acknowledgments

We would like to thank the children and their parents and guardians for participating in this study. We would like to thank all of the staff at the municipalities and policlinics who helped in many ways with data collection and sample analysis. HINASIC study group (Historia Natural de la Sibilancia en Cuba/National History of Wheezing in Cuba) consists of the following individuals:

### *National Institute of Hygiene, Epidemiology and Microbiology*

Silvia J Venero-Fernández (Leader), Ramón Suárez-Medina, Lenina Menocal-Heredia, Yuria Isabel Caraballo-Sánchez, Félix Manuel Rosado-García, Reina Amelia Quintana, Lourdes Batista-Gutiérrez. Patricia Varona-Pérez, María del Carmen Hinojosa.

### *Municipality of Arroyo Naranjo*

Esperanza de la C. Mora-Faife, María Teresa Méndez-Ratger, Amed Fernández-Casamayor, Gisela Álvarez-Valdez, Anadelis Alfonso-Hernández, Roberto Hidalgo-Mederos, Nereida Calderin-Martínez, Jorge Antonio Febles-del Toro, Danay Silva, Violeta Suarez-Angelo, Noevis Zayas-Mompie, Grisel M. Esquivel-Barrios, Zoe de los Angeles Figueroa-Barreto, Olga Lidia Negrin-Molina, Odalis Kessell- Díaz, Mariela de la Caridad Hernández-González, Dulcinea Casanave-Guarnaluce, Gretel Comas-Fonseca, Vilma Álvarez-Valdez, María Engracia Báez-Rodríguez, Felicia Sánchez-Cardentey, Nieves Sardinias-Báez, Roberto Esteban Márquez-Solís, Marlene Flores-Carballosa, Nagaby Gómez-Baro, Ivette Castillo-Aguilar.

### *Municipality of La Lisa*

Gladys García-García, María de Lourdes Ortiz-Hernández, María Antonia Betancourt-López, Marlén Batista-Cedeño, Iris Alfonso-Castellanos, Leticia Gómez-García, Ernesto Rafael Gutiérrez-Mendoza, María Luisa Loynaz-González, Nibenia Rodríguez-Trujillo, Yanet Pozo-Herrera, Víctor Manuel Montejo-Guerra, Julia Urbina-Reynaldo, Valentina Gómez-Suliman, Caridad Alicia Rodríguez-Aragón.

### *Municipality of Cerro*

Ileana del Valle-Infante, Martha Betancourt-Orue, Oscar Alba-Montegudo, Yuderkis Ferrer-Ceruto, Aída Damas-Martínez, Mercedes Peñalver-Pérez

### *Municipality of Habana del Este*

Liem Gómez-Marrero, Sarahí Castillo-Martínez, Amor de los Angeles Castaño-Vega, Norberto Torriente-Barzaga, Ileana Ávila-Rodríguez, Magalys Navarro-Ruiz, Kirenía

Díaz-Hernández, Iluska De La Torre Suarez, Gilberto Roque-Pereira, Yamilet Corona-Carnero, Idania Gonzalaz-Fernandez, Fidelia Romeu-Ravelo, Regla Hernandez-Ponce,

Teresa Serrano-González, Dulce Romeo-Cepero, Caridad Gonzalez Leiva, Teresa De Jesus Cobas Espino, Nuris-Fajardo, Midiala Perez-Arcia, Sarahy Diaz-Araujo, Yanet

Medina- Lescay, Sandra Collazo-Rodriguez, Julia Amparo Griñán-Ramos, Teresa Serrano-Gonzalez, Beatriz Lazo-Vazquez, Tania Pupo-Portal, Nidia Leyva-Porra, Odalys Pacheco-Mesa, Martha Rizo-Ramos, Yaneysi Vallafuerte- Perez, Aliniuska De La Paz-Arias, Maite B Garcia-Sotolongo, Yusimí Calzado-Herrera, Martha Nidia Rizo-Ramos, Guillermo Verdecia, Mayté B García-Sotolongo, Juana F Abreu-Quijano, Fidelia Romeo-Ravelo.

Thanks also to all Municipality Directors and the laboratory workers who have also supported the study.

## Author Contributions

**Conceptualization:** Ramón Suárez-Medina, Silvia Josefina Venero-Fernández, Andrew W. Fogarty.

**Data curation:** Ramón Suárez-Medina, Silvia Josefina Venero-Fernández.

**Formal analysis:** Andrew W. Fogarty.

**Funding acquisition:** Andrew W. Fogarty.

**Investigation:** Ramón Suárez-Medina.

**Methodology:** Ramón Suárez-Medina, Silvia Josefina Venero-Fernández, Andrew W. Fogarty.

**Project administration:** Ramón Suárez-Medina, Silvia Josefina Venero-Fernández.

**Supervision:** Ramón Suárez-Medina, Silvia Josefina Venero-Fernández, Lourdes Batista-Gutierrez, Yanelis de los Angeles Estrada-Rondon, Anadelis Alfonso-Hernandez, Dulcima Casanave-Guarnaluce, Nieves Sardinas-Baez, Ivette Castillo-Aguilar, Jorge Antonio Febles-del Toro.

**Validation:** Ramón Suárez-Medina, Silvia Josefina Venero-Fernández.

**Visualization:** Silvia Josefina Venero-Fernández.

**Writing – original draft:** Andrew W. Fogarty.

**Writing – review & editing:** Ramón Suárez-Medina, Silvia Josefina Venero-Fernández, Lourdes Batista-Gutierrez, Yanelis de los Angeles Estrada-Rondon, Anadelis Alfonso-Hernandez, Dulcima Casanave-Guarnaluce, Nieves Sardinas-Baez, Ivette Castillo-Aguilar, Jorge Antonio Febles-del Toro, Andrew W. Fogarty.

## References

1. Guzman M, Harris E. Dengue. *Lancet*. 2015; 385:453–65. [https://doi.org/10.1016/S0140-6736\(14\)60572-9](https://doi.org/10.1016/S0140-6736(14)60572-9) PMID: 25230594
2. Potts J, Rothman A. Clinical and laboratory features that distinguish dengue from other febrile illnesses in endemic populations. *Trop Medicine Int Health*. 2008; 13:1328–40.
3. Dumas R, Passos S, Oliveira R, Nogueira R, Ingebourg G, Marzochi K, et al. Clinical and laboratory features that discriminate dengue from other febrile illnesses: a diagnostic accuracy study in Rio de Janeiro. *Brasil. BMC Infectious Diseases*. 2013; 13:77. <https://doi.org/10.1186/1471-2334-13-77> PMID: 23394216
4. Huang S-Y, Lee I-K, Wang L, Liu J-W, Hung S-C, Chen C-C, et al. Use of simple clinical and laboratory predictors to differentiate influenza from dengue and other febrile illnesses in the emergency room. *BMC Infectious Diseases*. 2014; 14:623. <https://doi.org/10.1186/s12879-014-0623-z> PMID: 25421019
5. Hammond S, Balmaseda A, Perez L, Tellez Y, Saborio S, Mercado J, et al. Differences in dengue severity in infants, children, and adults in a 3-year hospital-based study in Nicaragua. *Am J Trop Med Hygiene*. 2005; 73:1063–70.
6. Deparis X, Murgue B, Roche C, Cassar O, Chungue E. Changing clinical and biological manifestations of dengue during the dengue-2 epidemic in French Polynesia in 1996/97—description and analysis in a prospective study. *Trop Medicine Int Health*. 1998; 3:859–65.
7. Chadwick D, Arch B, Wilder-Smith A, Paton N. Distinguishing dengue fever from other infections on the basis of simple clinical and laboratory features: Application of logistic regression analysis. *J Clinical Virology*. 2006; 35:147–53.
8. Low J, Ooi E-E, Tolfvenstam T, Leo Y-S, Hibberd M, Ng L-C, et al. Early dengue infection and outcome study (EDEN)—Study design and preliminary findings. *Ann Acad Med Singapore*. 2006; 35:783–9. PMID: 17160194
9. Kalayanarooj S, Vaughn D, Nimmannitya S, Green S, Suntayakorn S, Kunentrasai N, et al. Early clinical and laboratory indicators of acute dengue infection. *J Infectious Diseases*. 1997; 176:313–21.
10. Venero-Fernandez S, Suarez Medina R, Mora Faife E, García García G, del Valle Infante I, Gómez Marrero L, et al. Risk factors for wheezing in infants born in Cuba. *Quarterly Journal Medicine*. 2013; 106:1023–9.
11. Vircell dengue ELISA IgG. [http://www.peramed.com/peramed/docs/G1018\\_ENpdf](http://www.peramed.com/peramed/docs/G1018_ENpdf) (accessed 14/4/2016).
12. Fundora Hernández H, Suarez-Medina R, Venero Fernandez S, Mora Faife E, García García G, del Valle Infante I, et al. What are the main environmental exposures associated with elevated IgE in



- Cuban infants? A population-based study. *Tropical Medicine and International Health*. 2014; 19:545–54. <https://doi.org/10.1111/tmi.12293> PMID: 24674274
13. Venero-Fernandez S, Fundora-Hernández H, Batista-Gutierrez L, Suarez Medina R, Mora Faife E, Valle-Infante I, et al. The association of low birth weight with serum C reactive protein in three year old children living in Cuba: A population-based prospective study. *Am J Human Biol* 2016: <https://doi.org/10.1002/ajhb.22936> PMID: 27859847
  14. Sanchez O, Diaz J, Cataneda M, Leon J, Guzman M, Bermejo P. Clinical and seroepidemiological surveillance of dengue in Havana, 1997–2016. *Revista Cubana de Medicina Tropical*. 2018; 70:<http://revmedtropical.sld.cu/index.php/medtropical/article/view/314/200> (accessed 3/10/2018).
  15. Douglas R, Paton J, Duncan S, Hansman D. Antibody Response to Pneumococcal Vaccination in Children Younger than Five Years of Age. *J Infectious Diseases*. 1983; 148:131–7.
  16. Guzman M, Kouri G, Valdes L, Bravo J, Alvarez M, Vazquez S, et al. Epidemiologic studies on dengue in Santiago de Cuba, 1997. *Am J Epidem*. 2000; 152:793–9.
  17. Burke D, Nisalak A, Johnson D, Scott R. A prospective study of dengue infections in Bangkok. *Am J Trop Med Hygiene*. 1988; 38:172–80.
  18. Vaughn DW. Invited commentary: Dengue lessons from Cuba. *Am J Epidemiol*. 2000; 152(9):800–3. PMID: [11085390](https://pubmed.ncbi.nlm.nih.gov/11085390/).
